# Supplementary material for: Comparative evaluation of the impact on endothelial cells induced by different nanoparticle structures and functionalization
Source: PubMed Central journal article supplement (PMC4362490; doi:10.3762/bjnano.6.28), 2015-01-27
Supplement: Beilstein_J_Nanotechnol-06-300-s001.pdf [file Beilstein_J_Nanotechnol-06-300-s001.pdf]

## Supporting Information

for

### Comparative evaluation of the impact on endothelial cells induced by different nanoparticle structures and functionalization

Lisa Landgraf\*<sup>§1</sup>, Ines Müller<sup>1</sup>, Peter Ernst<sup>1</sup>, Miriam Schäfer<sup>1</sup>, Christina Rosman<sup>2</sup>, Isabel Schick<sup>3</sup>, Oskar Köhler<sup>3</sup>, Hartmut Oehring<sup>4</sup>, Vladimir V. Breus<sup>5</sup>, Thomas Basché<sup>5</sup>, Carsten Sönnichsen<sup>2</sup>, Wolfgang Tremel<sup>3</sup> and Ingrid Hilger\*<sup>§1</sup>

Address: <sup>1</sup>Institut für Diagnostische und Interventionelle Radiologie des Klinikums der Friedrich-Schiller-Universität Jena, Bachstraße 18, D-07740 Jena, Germany; <sup>2</sup>Institut für Physikalische Chemie, Johannes Gutenberg Universität Mainz, Duesbergweg 10-14, D-55128 Mainz, Germany; <sup>3</sup>Johannes Gutenberg-Universität, Institut für Anorganische Chemie und Analytische Chemie, Duesbergweg 10-14, D-55128 Mainz, Germany; <sup>4</sup>Institut für Anatomie II, Universitätsklinikum Jena, Teichgraben 7, D-07743 Jena, Germany and <sup>5</sup>Institut für Physikalische Chemie, Johannes Gutenberg Universität Mainz, Duesbergweg 10-14, D-55128 Mainz, Germany

Email: Lisa Landgraf\* - Lisa.Landgraf@med.uni-jena.de;

Ingrid Hilger\* - ingrid.hilger@med.uni-jena.de

\* Corresponding author

<sup>§</sup>Institut für Diagnostische und Interventionelle Radiologie des Klinikums der Friedrich-Schiller-Universität Jena, Forschungszentrum Lobeda, Erlanger Allee 111, D-07747 Jena, Germany. Phone: 0049-(0)3641-9325921, Fax: 0049-3641-9325922

### Additional figures

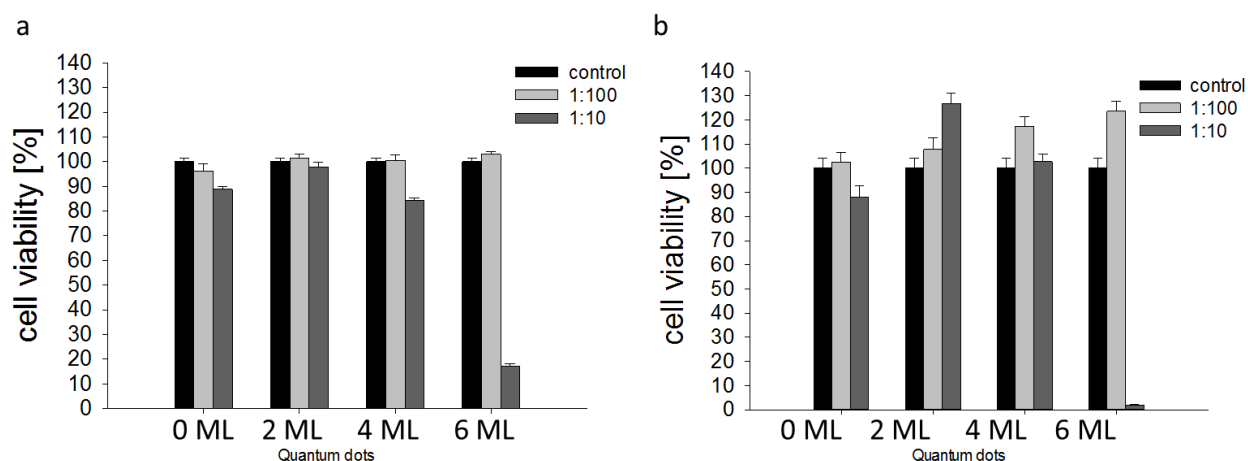

**Figure S1:** Cell viability of endothelial SVEC4-10 cells after exposure to different numbers of monolayers (0 to 6 ML) QDs after 24 h (a) and 72 h (b) of incubation as measured by the MTS assay.

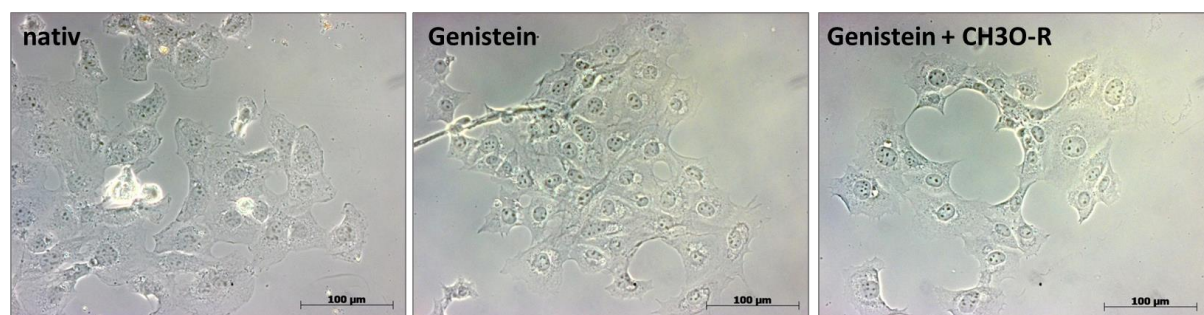

**Figure S2:** Microscopical analysis of SVEC4-10 cells after treatment with endocytosis inhibitor genistein and CH<sub>3</sub>O functionalized gold nanoparticles. Scale bars indicate 100 µm.
